# Supplementary material for: Current Updates on Involvement of Artificial Intelligence and Machine Learning in Semen Analysis
Source: MDPI journal article supplement (doi:10.3390/medicina60020279), 2024-02-06
Supplement: s1 [file s1]

**Supplementary Table S1:** Studies employing artificial intelligence (AI) or machine learning (ML) to evaluate or predict semen parameters, sperm DNA damage and outcome of surgical testicular sperm extraction (TESE).

| Studies                          | Dataset/ Sample                | AI/ ML Algorithm or Model                            | Parameter(s) Evaluated or Predicted                |
|----------------------------------|--------------------------------|------------------------------------------------------|----------------------------------------------------|
| Kuroda et al., 2023 [50]         | Semen                          | CNN                                                  | Sperm DNA fragmentation                            |
| Noy et al., 2023 [51]            | Semen                          | CNN                                                  | Sperm DNA fragmentation                            |
| Bachelot et al., 2023 [53]       | Semen                          | DNN                                                  | Predict success of sperm retrieval in men with NOA |
| Ory et al., 2022 [26]            | Semen                          | Logistic regression, SVM and RF                      | Sperm concentration                                |
| Ottl et al., 2022 [32]           | WISEM                          | SVR, MLP, CNN, RNN                                   | Sperm motility                                     |
| Sato et al., 2022 [40]           | JSD                            | DL                                                   | Sperm morphology                                   |
| Lee et al., 2022 [58]            | Semen                          | CNN                                                  | Rare sperm detection in microTESE samples          |
| Abbasi et al., 2021 [41]         | MHSMA                          | DTL, DMTL                                            | Sperm morphology                                   |
| Marín & Chang 2021 [35]          | SCIAN-SpermSegGS               | DL, U-Net and Mask-RCNN                              | Sperm morphology                                   |
| Somasundaram & Nirmala 2021 [33] | Semen                          | THMA                                                 | Sperm motility                                     |
| Yüzkat et al., 2021 [36]         | SMIDS, HuSHeM and SCIAN-Morpho | CNN                                                  | Sperm morphology                                   |
| Wu et al., 2021 [57]             | Semen                          | DNN                                                  | Sperm detection in microTESE samples               |
| Iqbal et al., 2020 [42]          | SCIAN and HuSHeM               | CNN                                                  | Sperm morphology                                   |
| Lesani et al., 2020 [23]         | Semen                          | FSNN, SPNN                                           | Sperm concentration                                |
| Nygate et al., 2020 [43]         | Semen                          | HoloStain                                            | Sperm morphology                                   |
| Tsai et al., 2020 [27]           | Semen                          | Image recognition algorithm and Bemaner AI algorithm | Sperm concentration and motility                   |
| Valiuškaitė et al., 2020 [34]    | WISEM                          | CNN                                                  | Sperm motility and morphology                      |

|                                 |                  |                                  |                                                                     |
|---------------------------------|------------------|----------------------------------|---------------------------------------------------------------------|
| Zeadna et al., 2020 [54]        | Semen            | GBTs                             | Predict the presence or absence of spermatozoa in patients with NOA |
| Dubey et al., 2019 [20]         | Semen            | SVM                              | Sperm motility and morphology                                       |
| Hicks et al., 2019 [31]         | WISEM            | CNN                              | Sperm motility                                                      |
| Javadi & Mirroshandel 2019 [39] | MHSMA            | DL                               | Sperm morphology                                                    |
| McCallum et al., 2019 [49]      | Semen            | Deep-CNN                         | Sperm DNA fragmentation                                             |
| Movahed et al., 2019 [44]       | SCIAN            | CNN and SVM                      | Sperm morphology                                                    |
| Riordon et al., 2019 [45]       | HuSHeM and SCIAN | Deep-CNN                         | Sperm morphology                                                    |
| Wang et al., 2019 [52]          | Semen            | Linear and non-Linear Regression | Sperm DNA fragmentation                                             |
| Chang et al., 2017 [38]         | SCIAN            | NN, NB, Decision trees, SVM      | Sperm morphology                                                    |
| Goodson et al., 2017 [29]       | Semen            | SVM                              | Sperm motility                                                      |
| Mirsky et al., 2017 [46]        | Semen            | SVM                              | Sperm morphology                                                    |
| Shaker et al., 2017 [47]        | SCIAN and HuSHeM | Dictionary learning              | Sperm morphology                                                    |
| Shaker et al., 2016 [37]        | Semen            | Tail point algorithm             | Sperm morphology                                                    |
| Girela et al., 2013 [25]        | Semen            | ANN                              | Sperm concentration                                                 |
| Ramasamy et al., 2013 [56]      | Semen            | ANN                              | Predict success of sperm retrieval in men with NOA before microTESE |
| Samli & Dogan 2004 [55]         | Semen            | ANN                              | Predict the presence or absence of spermatozoa in patients with NOA |

ANN- Artificial Neural Network, CNN-Convolutional Neural Network, Deep CNN- Deep Conventional Neural Network, DL- Deep Learning, DNN-Deep Neural Network, DTL- Deep Transfer Learning, DMTL- Deep Multi-task Transfer Learning, FSNN- Full Spectrum Neural Network, GBTs- Gradient-Boosted Trees, HuSHeM- Human Sperm Head Morphology, JSD- Jikei Sperm Data set, MHSMA- Modified Human Sperm Head Morphology analysis, MLP- Multilayer Perceptron, NOA- Non Obstructive Azoospermia, NN- Neural Network, NB- naive Bayes, R-CNN- Region Based Convolutional Neural Networks, RF- Random Forest, RNN- recurrent neural network, SPNN- Selected Peak Neural Network, SVM-Support Vector Machine, SVR- Linear Support Vector Regressor, THMA- Tail to Head movement algorithm
